# Supplementary material
Source: PubMed Central journal article supplement (PMC8808379)

**TABLE S1. Mutational analysis for a panel of tumor suppressor genes and oncogenes in the different clones used in the study.**

|    | Gene    | CLONE                |                      |                      |                      |                      |                      |
|----|---------|----------------------|----------------------|----------------------|----------------------|----------------------|----------------------|
|    |         | FP#1                 | LM#1                 | FP#2                 | LM#2                 | SUM159-3D            | SUM159-2D            |
| 1  | AKT1    |                      |                      |                      |                      |                      |                      |
| 2  | ALK     |                      |                      |                      |                      |                      |                      |
| 3  | AR      |                      |                      |                      |                      |                      |                      |
| 4  | BRAF    |                      |                      |                      |                      |                      |                      |
| 5  | CDK4    |                      |                      |                      |                      |                      |                      |
| 6  | CTNNB1  |                      |                      |                      |                      |                      |                      |
| 7  | DDR2    |                      |                      |                      |                      |                      |                      |
| 8  | EGFR    |                      |                      |                      |                      |                      |                      |
| 9  | ERBB2   |                      |                      |                      |                      |                      |                      |
| 10 | ERBB3   |                      |                      |                      |                      |                      |                      |
| 11 | ERBB4   |                      |                      |                      |                      |                      |                      |
| 12 | ESR1    |                      |                      |                      |                      |                      |                      |
| 13 | FGFR2   |                      |                      |                      |                      |                      |                      |
| 14 | FGFR3   |                      |                      |                      |                      |                      |                      |
| 15 | GNA11   |                      |                      |                      |                      |                      |                      |
| 16 | GNAQ    |                      |                      |                      |                      |                      |                      |
| 17 | HRAS    | G12D (63,60%)        | G12D (66,15%)        | G12D (66,77%)        | G12D (70,16%)        | G12D(62,35%)         | G12D (55,78%)        |
| 18 | IDH1    |                      |                      |                      |                      |                      |                      |
| 19 | IDH2    |                      |                      |                      |                      |                      |                      |
| 20 | JAK1    |                      |                      |                      |                      |                      |                      |
| 21 | JAK2    |                      |                      |                      |                      |                      |                      |
| 22 | JAK3    |                      |                      |                      |                      |                      |                      |
| 23 | KIT     |                      |                      |                      |                      |                      |                      |
| 24 | KRAS    |                      |                      |                      |                      |                      |                      |
| 25 | MAP2K1  |                      |                      |                      |                      |                      |                      |
| 26 | MAP2K2  |                      |                      |                      |                      |                      |                      |
| 27 | MET     |                      |                      |                      |                      |                      |                      |
| 28 | MTOR    |                      |                      |                      |                      |                      |                      |
| 29 | NRAS    |                      |                      |                      |                      |                      |                      |
| 30 | PDGFRA  |                      |                      |                      |                      |                      |                      |
| 31 | PIK3CA  | H1047L (50,03%)      | H1047L (66,58%)      | H1047L(72,46%)       | H1047L (68,16)       | H1047L (60,8%)       | H1047L (62,61%)      |
| 32 | PTEN    |                      |                      |                      |                      |                      |                      |
| 33 | PTPN11  |                      |                      |                      |                      |                      |                      |
| 34 | ROS     |                      |                      |                      |                      |                      |                      |
| 35 | RB1     |                      |                      |                      |                      |                      |                      |
| 36 | RET     |                      |                      |                      |                      |                      |                      |
| 37 | SMAD4   |                      |                      |                      |                      |                      |                      |
| 38 | SMARCB1 |                      |                      |                      |                      |                      |                      |
| 39 | SMO     |                      |                      |                      |                      |                      |                      |
| 40 | SRC     |                      |                      |                      |                      |                      |                      |
| 41 | STK11   |                      |                      |                      |                      |                      |                      |
| 42 | TP53    | V157_R158insL (100%) |
| 43 | VHL     |                      |                      |                      |                      |                      |                      |

**TABLE S2. Analysis of gene copy variation for a panel of oncogenes in the different clones used in the study.**

|    | GENE   | CLONE        |           |           |             |           |           |
|----|--------|--------------|-----------|-----------|-------------|-----------|-----------|
|    |        | FP#1         | LM#1      | FP#2      | LM#2        | SUM159-3D | SUM159-2D |
| 1  | ALK    |              |           |           |             |           |           |
| 2  | AR     |              |           |           |             |           |           |
| 3  | BRAF   |              |           |           |             |           |           |
| 4  | CCND1  |              |           |           |             |           |           |
| 5  | CDK4   |              |           |           |             |           |           |
| 6  | CDK6   |              |           |           |             |           |           |
| 7  | EGFR   |              |           |           |             |           |           |
| 8  | ERBB2  |              |           |           |             |           |           |
| 9  | FGFR1  |              |           |           |             |           |           |
| 10 | FGFR2  |              |           |           |             |           |           |
| 11 | FGFR3  |              |           |           |             |           |           |
| 12 | FGFR4  |              |           |           |             |           |           |
| 13 | KIT    |              |           |           |             |           |           |
| 14 | KRAS   |              |           |           |             |           |           |
| 15 | MET    |              |           |           |             |           |           |
| 16 | MYC    | 52,03 (0,34) | 54 (0,32) | 86 (0,32) | 88,7 (0,37) | 79 (0,34) | 96 (0,30) |
| 17 | MYCN   |              |           |           |             |           |           |
| 18 | PDGFRA |              |           |           |             |           |           |
| 19 | PIK3CA |              |           |           |             |           |           |
| 20 | JAK1   |              |           |           |             |           |           |

# Supplementary Figure S1

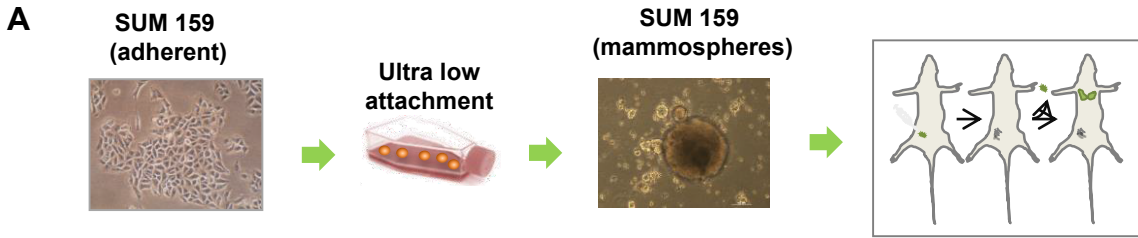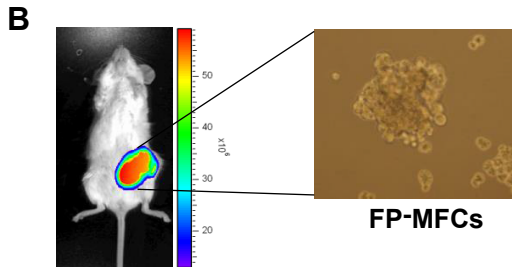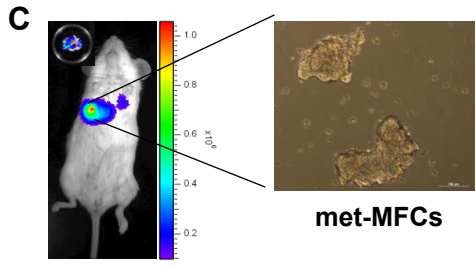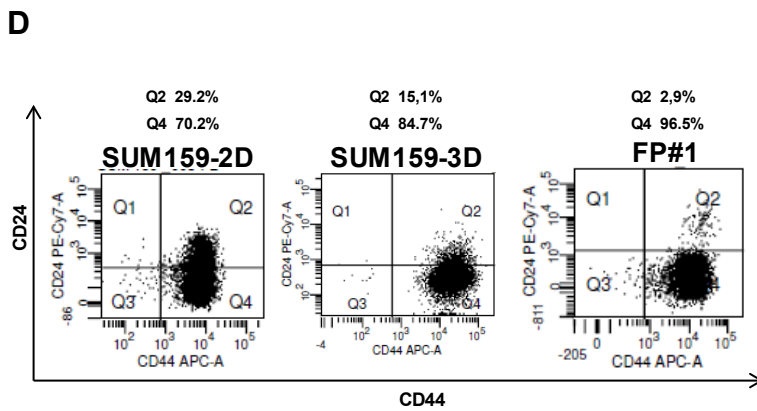

**F**

| Confidence intervals for 1/(stem cell frequency) |       |          |       |
|--------------------------------------------------|-------|----------|-------|
| Group                                            | Lower | Estimate | Upper |
| FP#1                                             | 2.21  | 1.75     | 1.44  |
| FP#6                                             | 1.79  | 1.54     | 1.35  |
| SUM159-2D                                        | 25.86 | 18.94    | 13.91 |

  

| Overall test for differences in SCF between any of the groups |    |          |
|---------------------------------------------------------------|----|----------|
| Chisq                                                         | DF | P.Value  |
| 319                                                           | 3  | 6.58e-69 |

*SCF: stem cell frequencies*

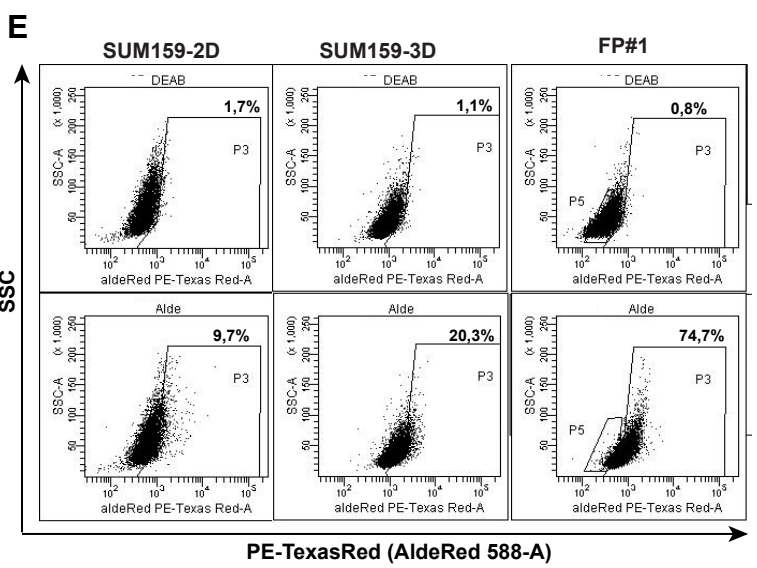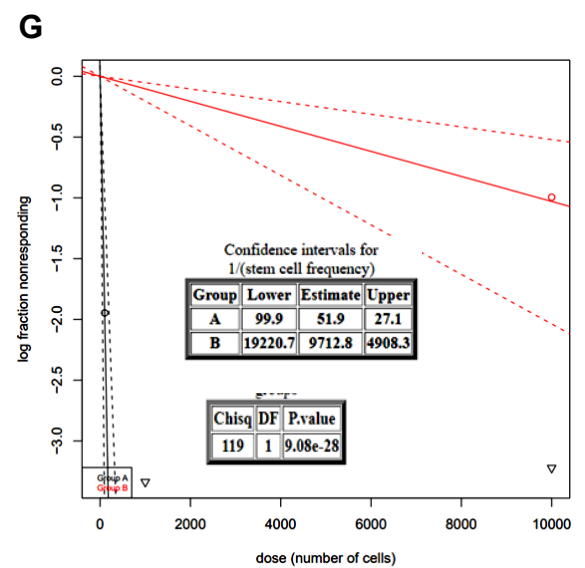

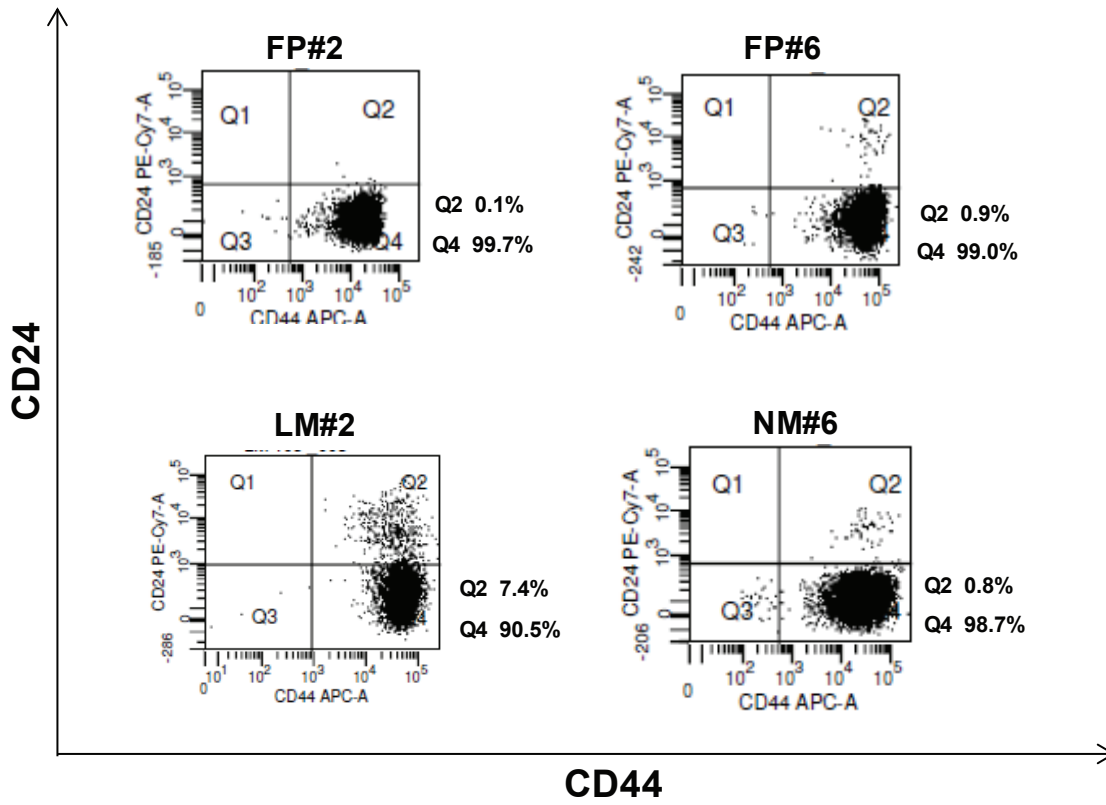

# Supplementary Figure S3

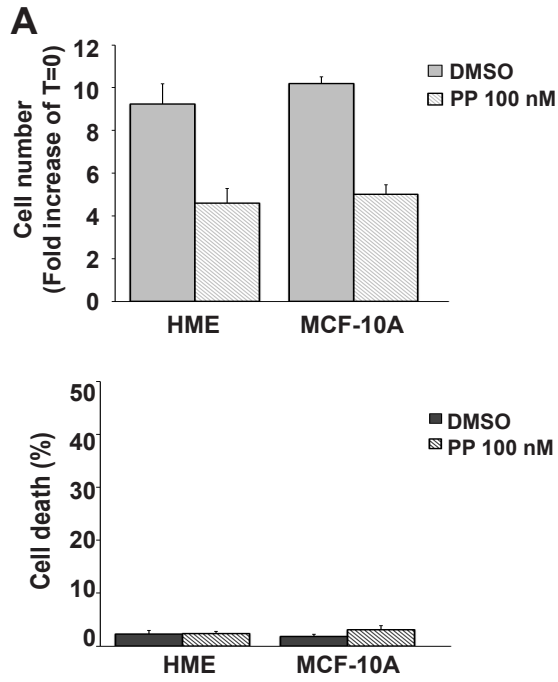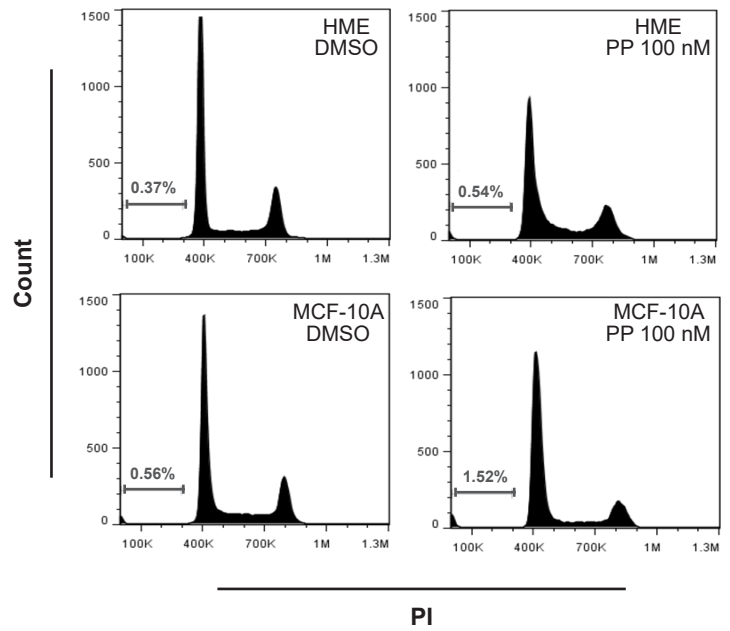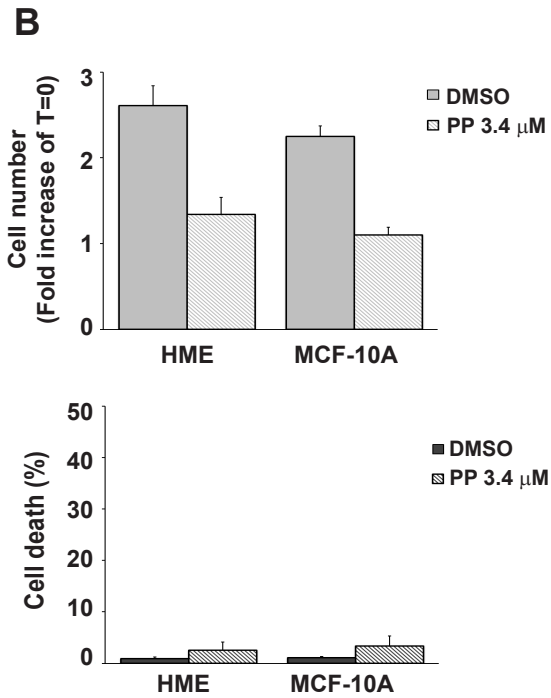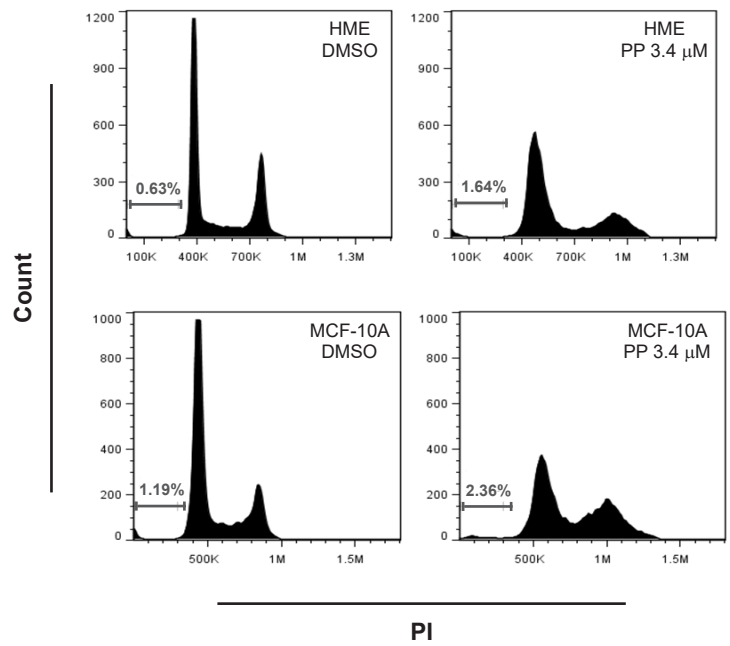

# Supplementary Figure S4

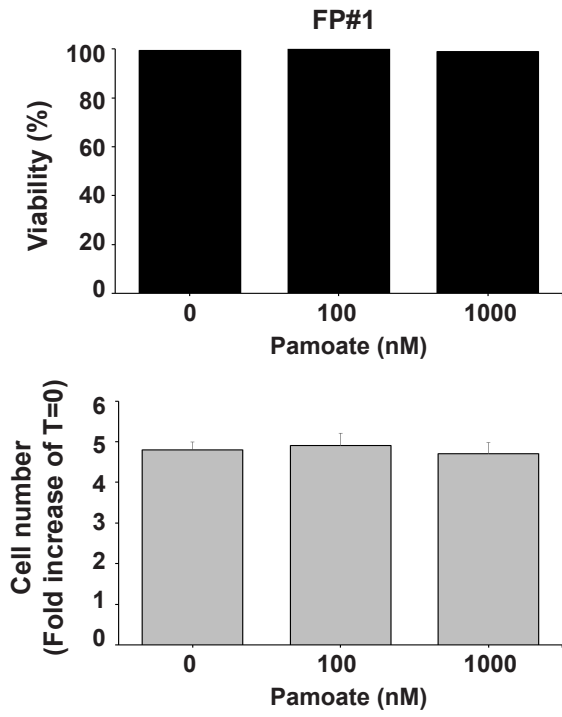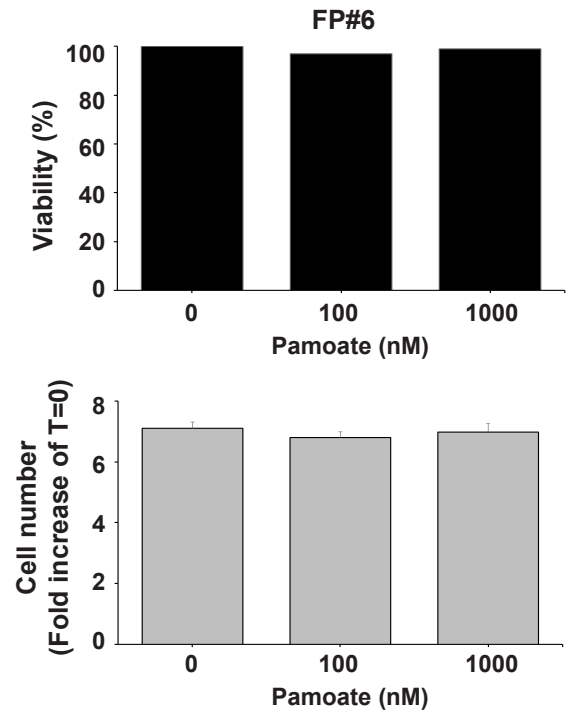

# Supplementary Figure S5

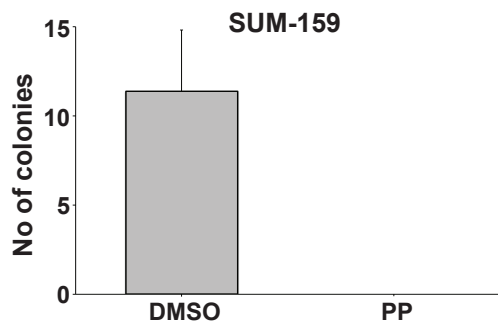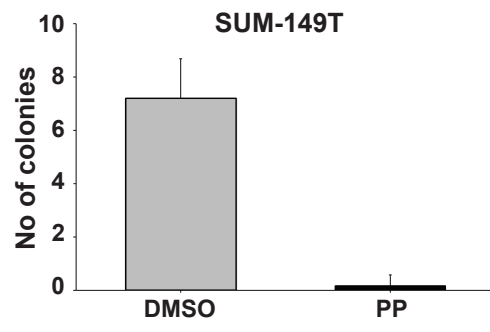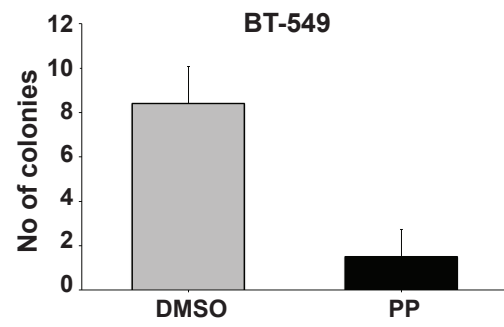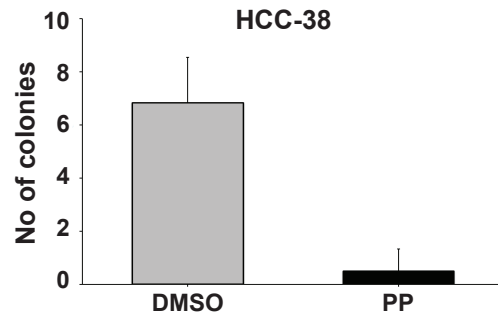

A

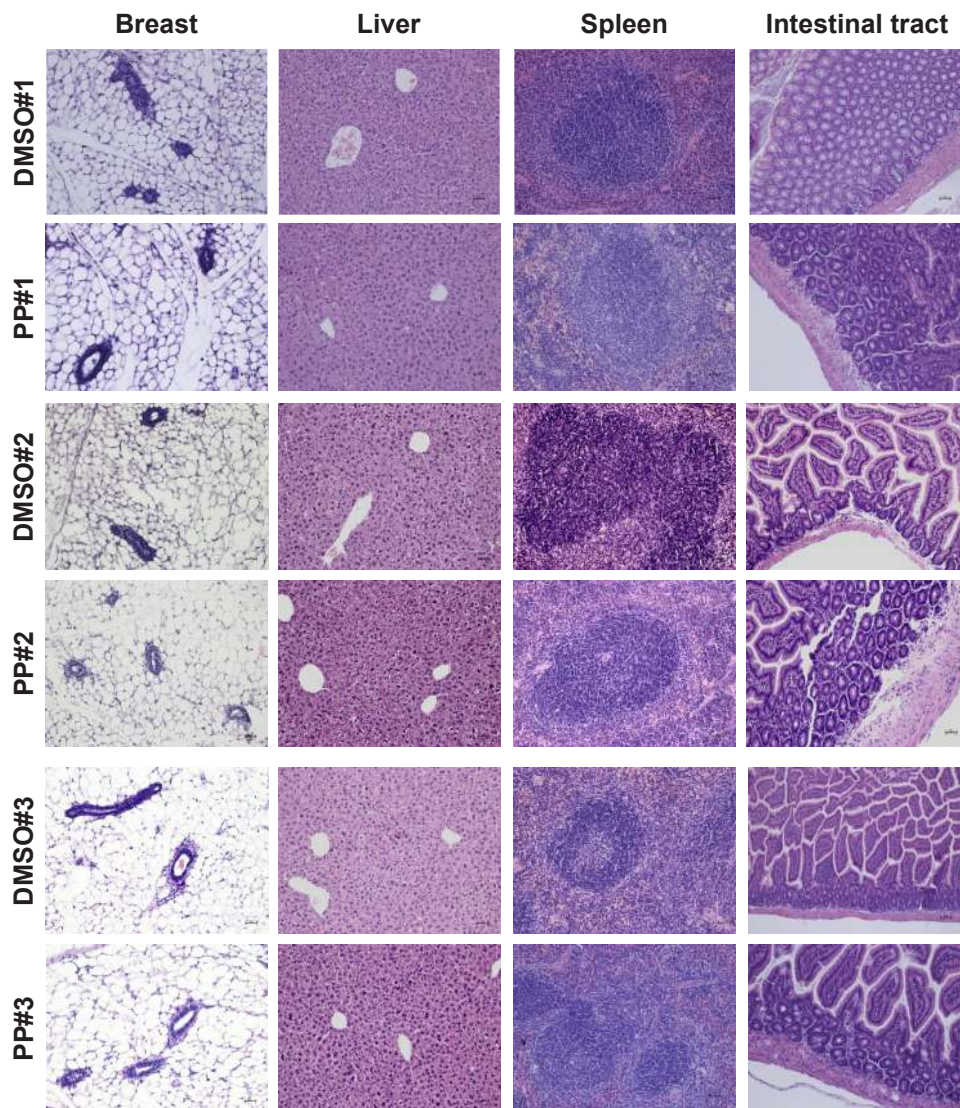

B

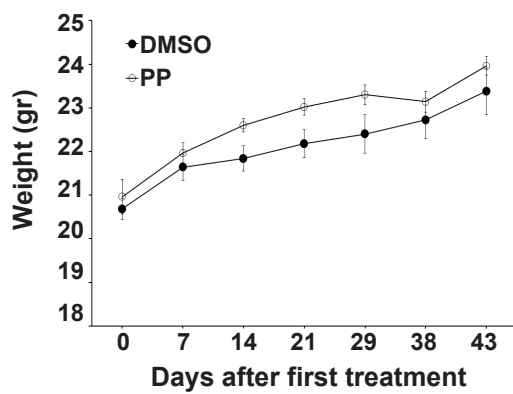

C

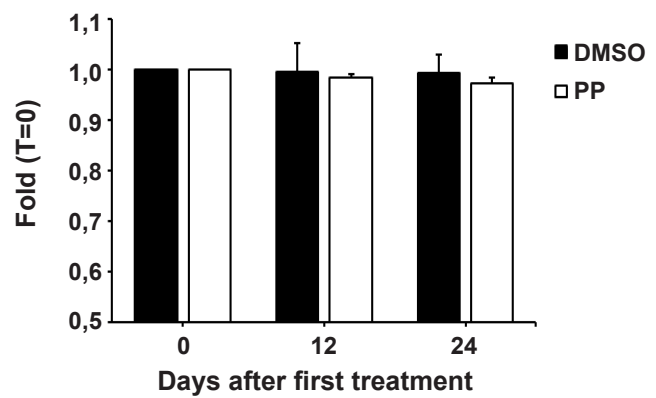



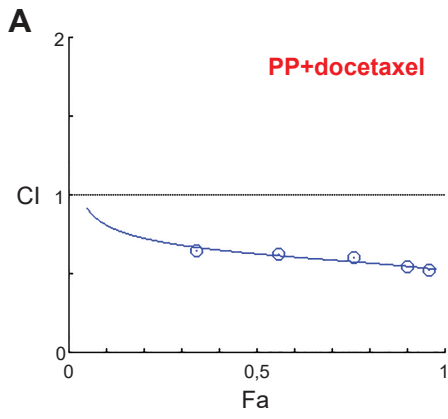

CI values for actual experimental points:

| Fa   | CI Value |
|------|----------|
| 0.34 | 0.64938  |
| 0.56 | 0.62332  |
| 0.76 | 0.60718  |
| 0.9  | 0.54471  |
| 0.96 | 0.52292  |

CI values at:

| Combo | lc50    | lc75    | lc90    | lc95    |
|-------|---------|---------|---------|---------|
|       | 0.62875 | 0.57989 | 0.54950 | 0.53685 |

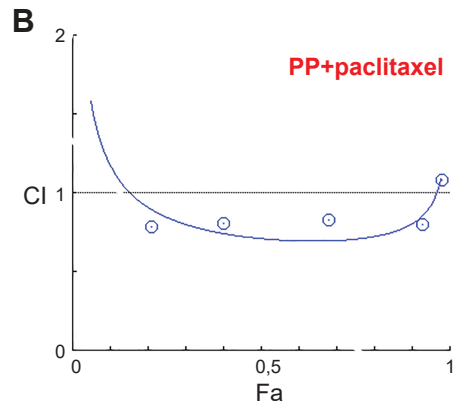

CI values for actual experimental points:

| Fa   | CI Value |
|------|----------|
| 0.21 | 0.78323  |
| 0.4  | 0.80978  |
| 0.68 | 0.82927  |
| 0.93 | 0.80307  |
| 0.98 | 1.08277  |

CI values at:

| Combo | lc50    | lc75    | lc90    | lc95    |
|-------|---------|---------|---------|---------|
|       | 0.71151 | 0.70826 | 0.80646 | 0.92617 |

# Supplementary Figure S8

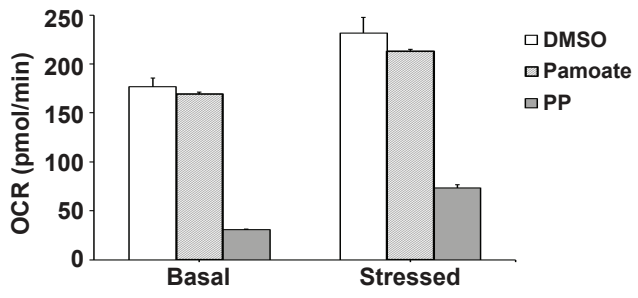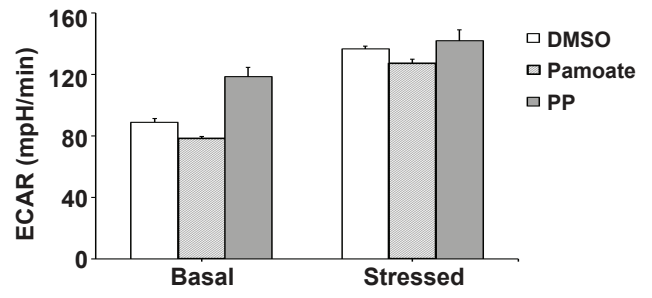

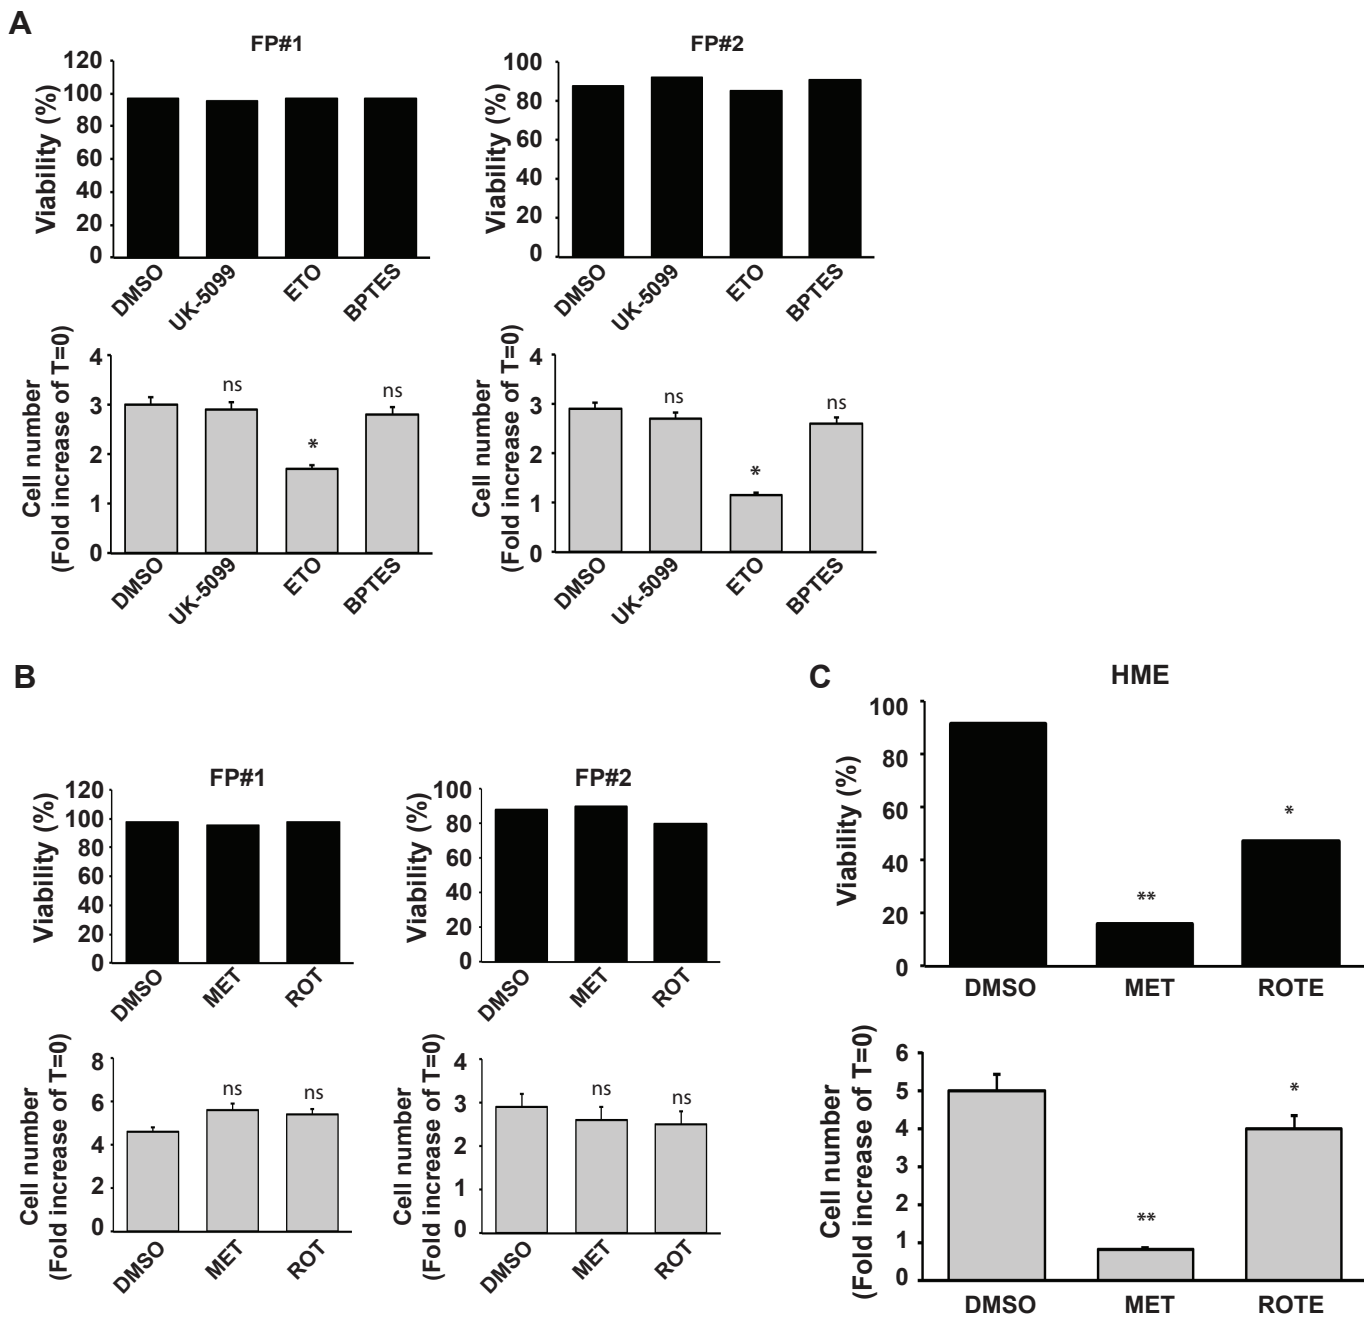

A

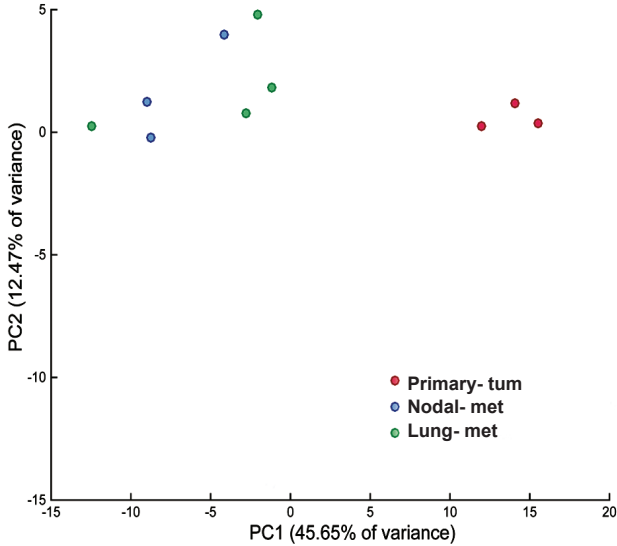

B

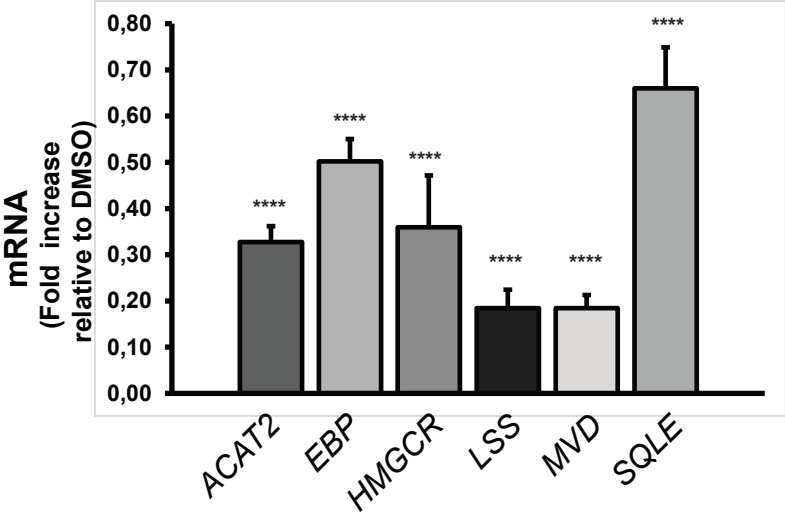

**A**

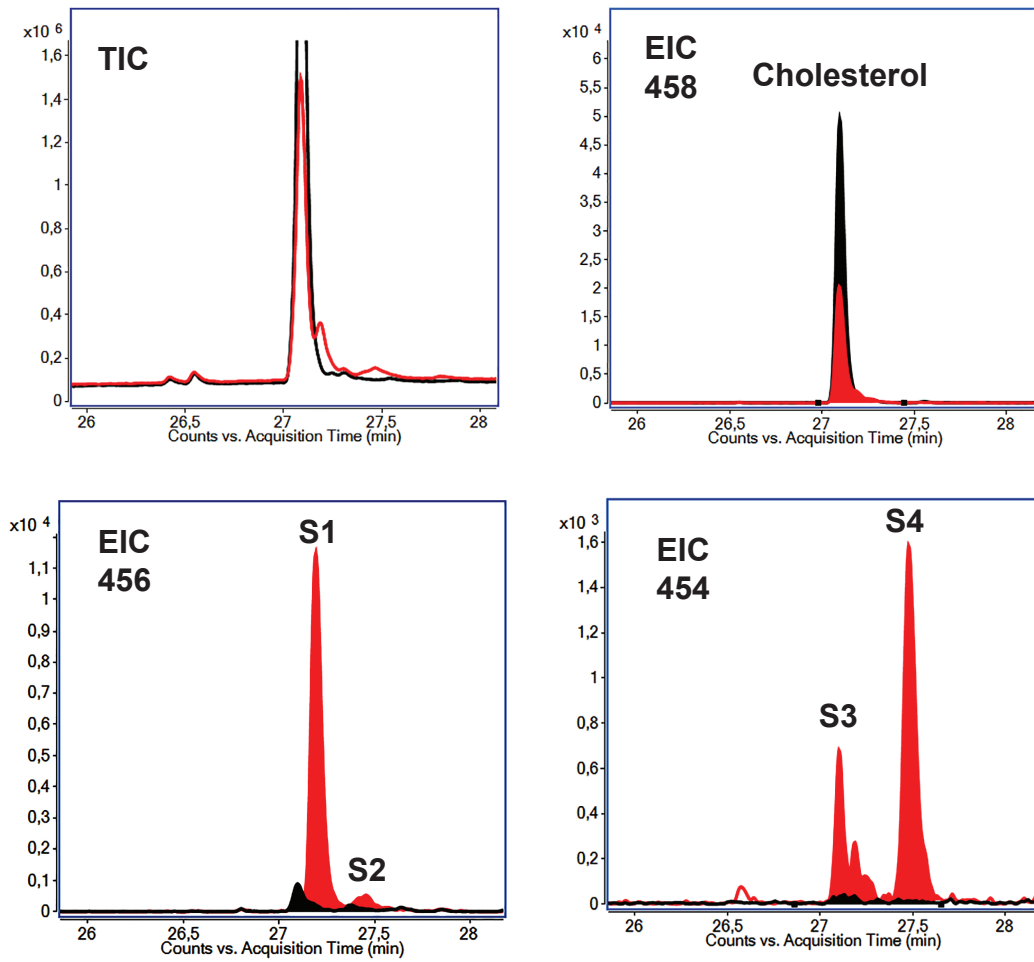

**B**

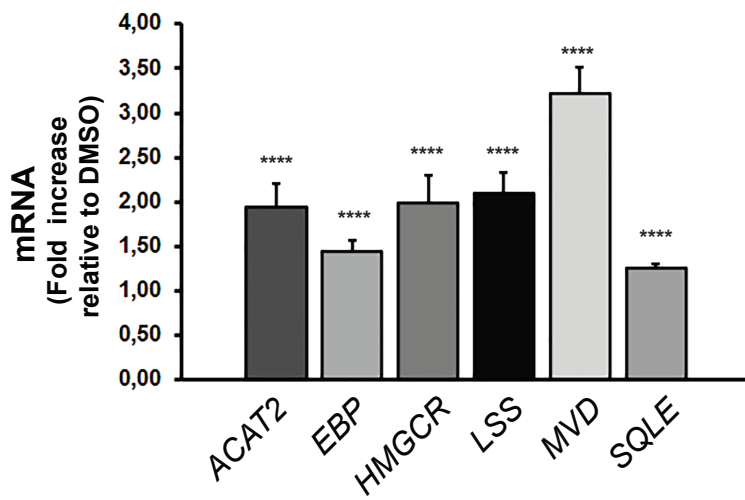

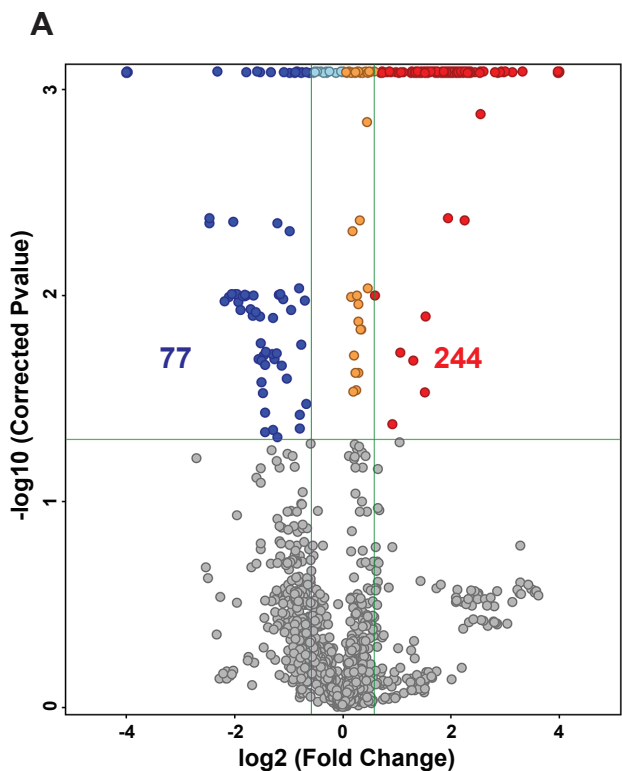

Color by p-value fold change cut-offs

- Failed to pass both cut-offs
- Passed both cut-offs and down-regulated
- Passed both cut-offs and up-regulated
- Failed to pass fold change cut-off and up-regulated
- Failed to pass fold change cut-off and down-regulated

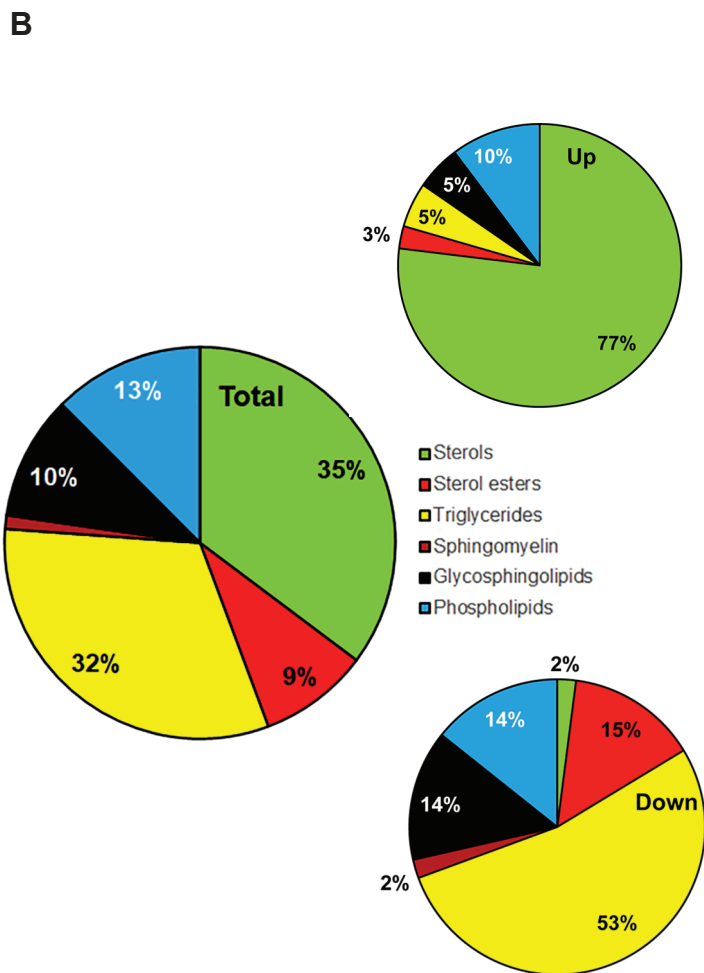

**C**

**TG abundance (nmol/mg protein)**

■ DMSO ■ PP

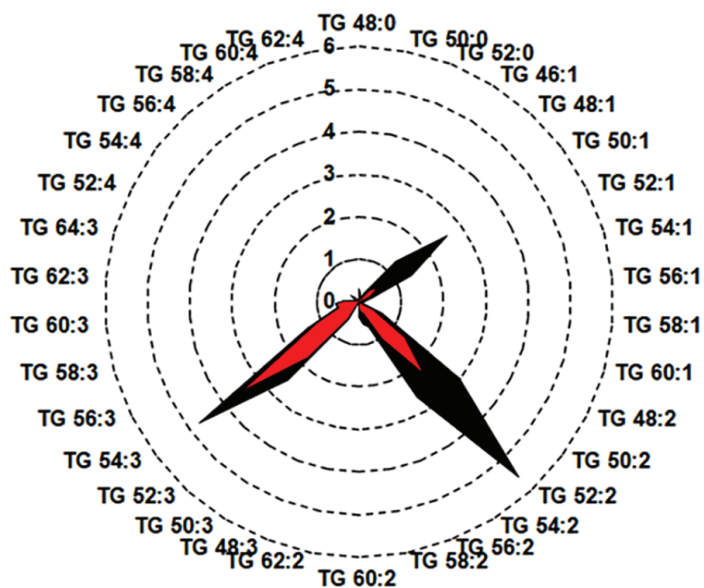

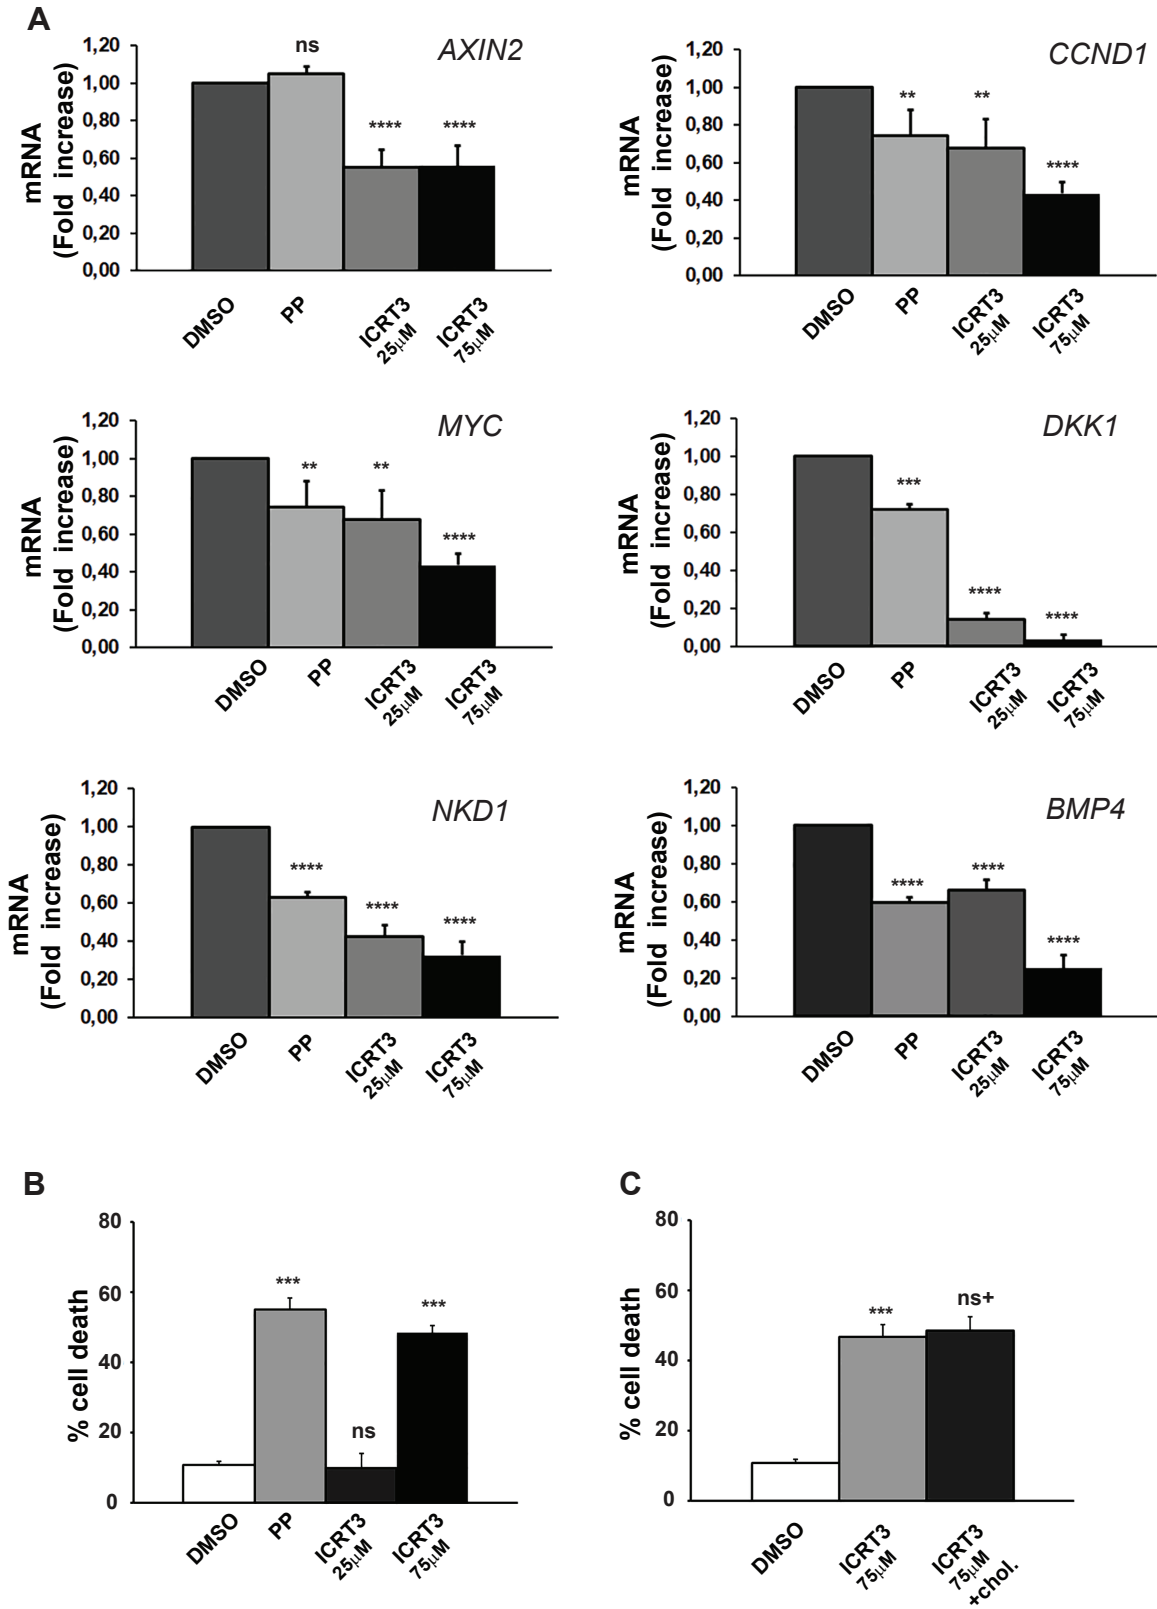

# Supplementary Figure S14

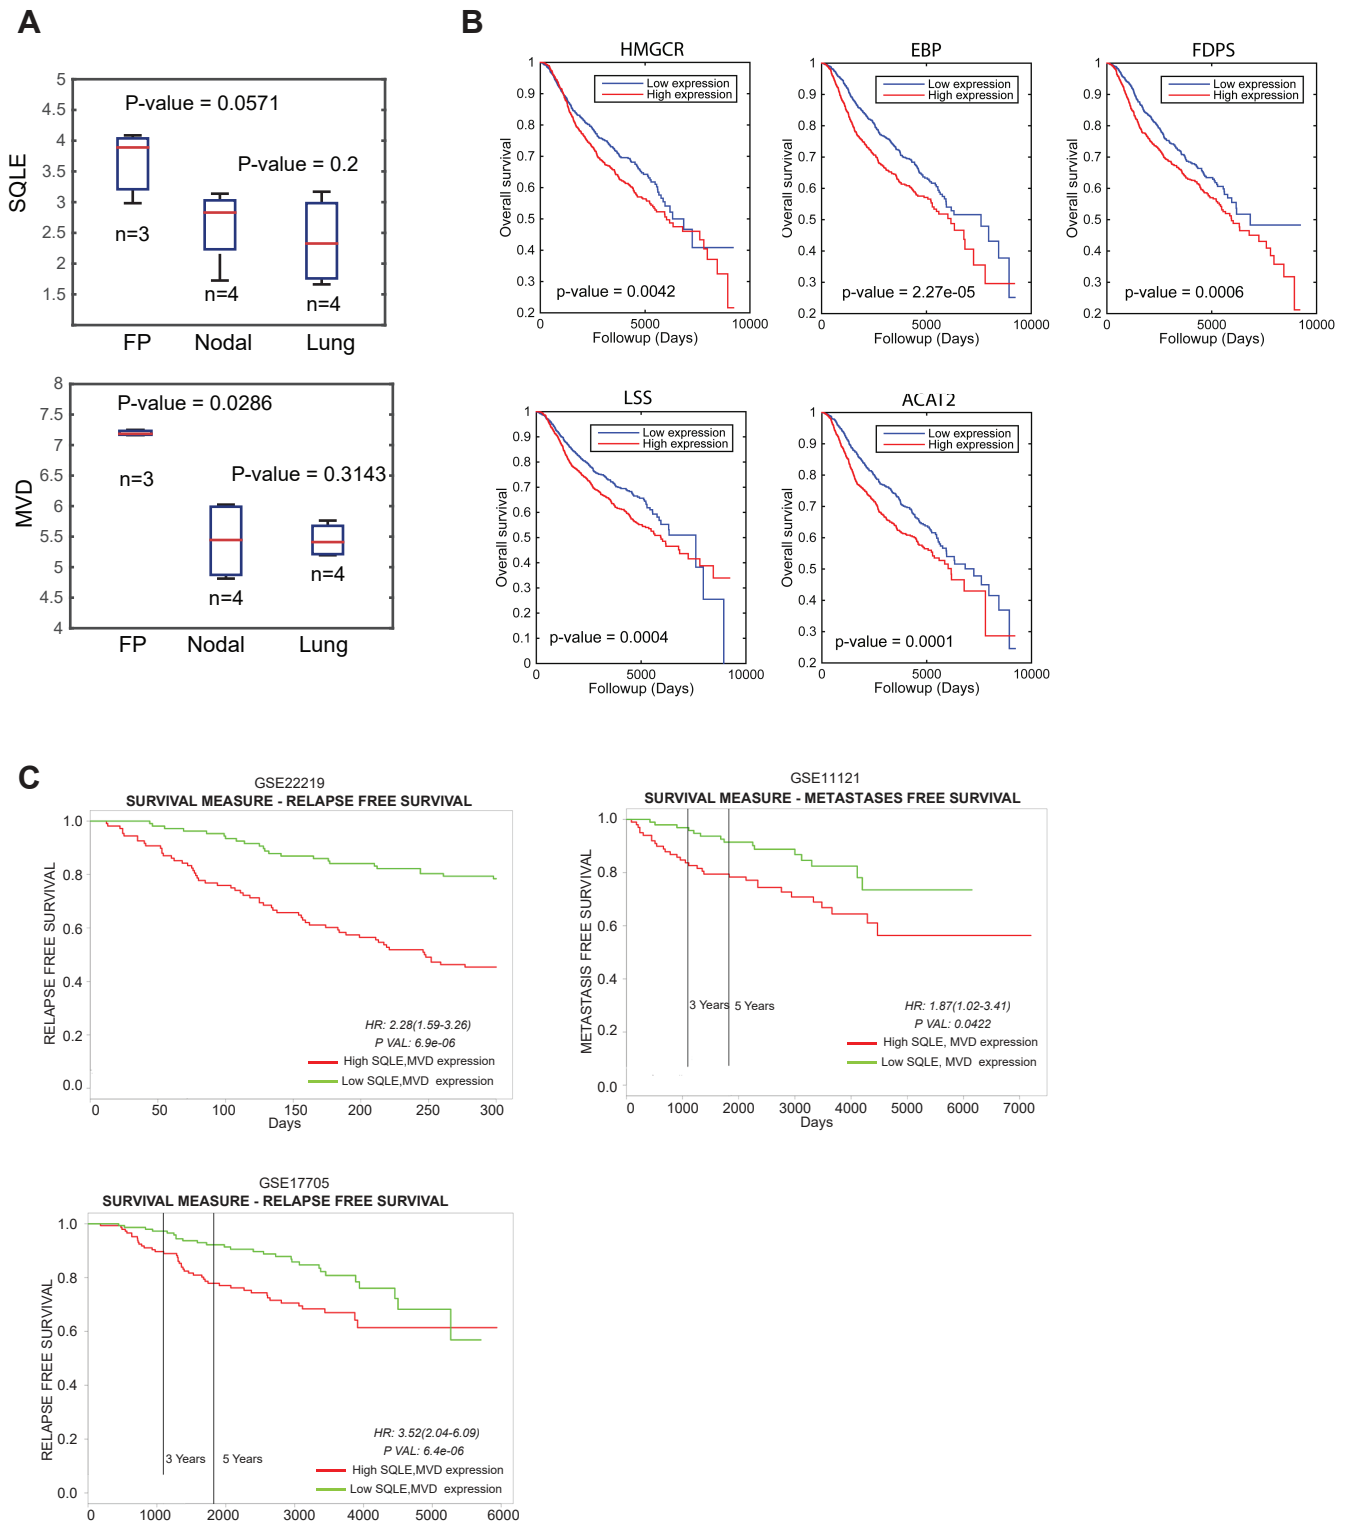

Supplement: NIHMS1765270-supplement-Supple_figs_tables.pdf [file NIHMS1765270-supplement-Supple_figs_tables.pdf]
